# Supplementary material for: Mixed dimensional 0D/3D perovskite heterostructure for efficient green light-emitting diodes
Source: Royal Society of Chemistry journal article supplement (doi:10.1039/d1tc03611d), 2021-01-01
Supplement: d1tc03611d1.pdf [file d1tc03611d1.pdf]

## Supporting Information

# Mixed-Dimensional 0D/3D Perovskite Heterostructure for Efficient Green Light Emitting Diodes

*Lyuchao Zhuang<sup>a</sup>, Lingling Zhai<sup>a</sup>, Yanyong Li<sup>a</sup>, Hui Ren<sup>a</sup>, Mingjie Li<sup>a</sup>, Shu Ping Lau<sup>a\*</sup>*

<sup>a</sup>Department of Applied Physics, The Hong Kong Polytechnic University, Hung Hom,  
Kowloon 999077, Hong Kong, People's Republic of China

\* Corresponding author. E-mail: [apsplau@polyu.edu.hk](mailto:apsplau@polyu.edu.hk) (S. P. Lau)

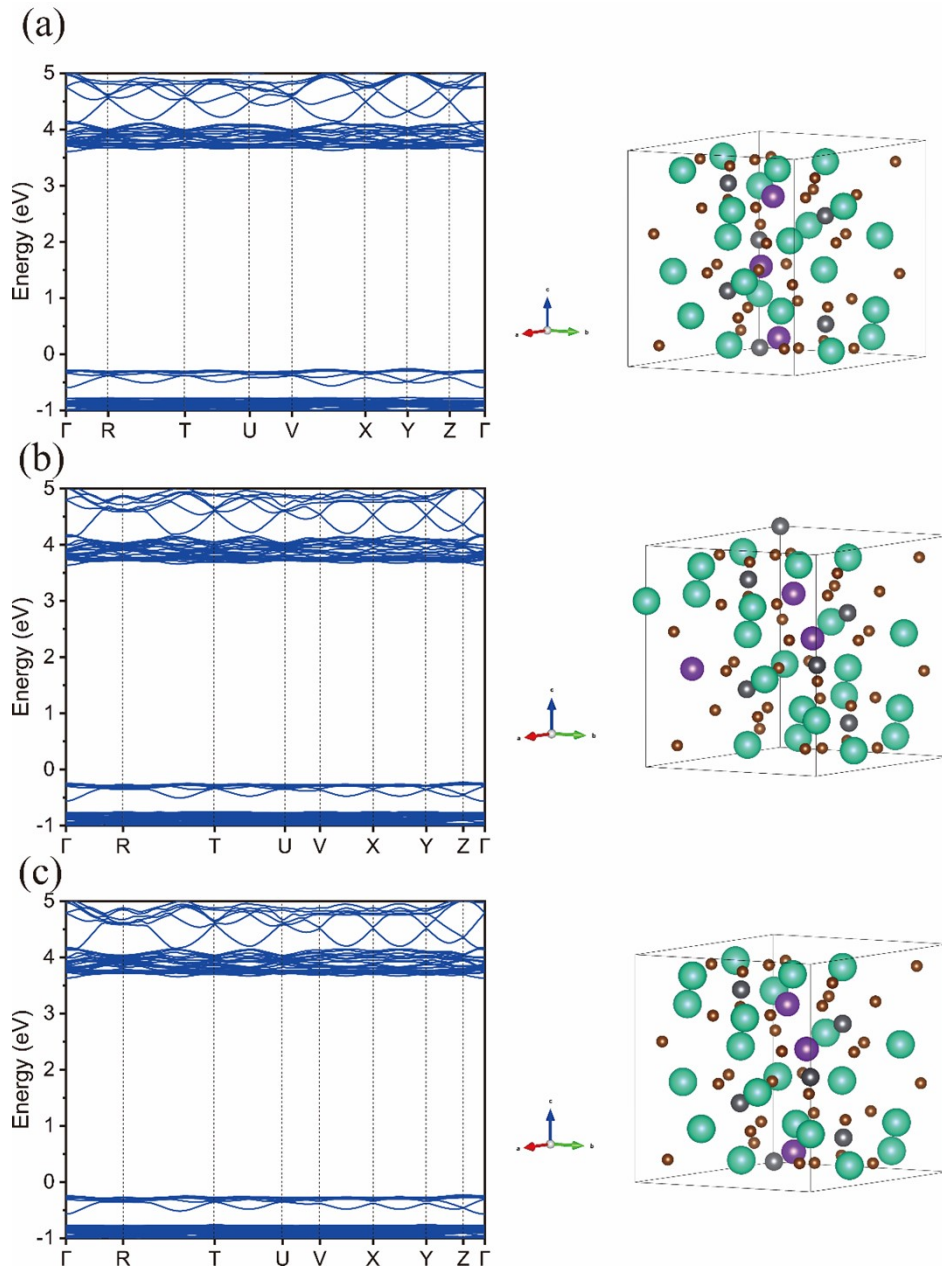

**Figure S1** Energy band structure of the sample with three Cs atoms are replaced by K atoms, denoted as  $\text{Cs}_{21}\text{K}_3\text{Pb}_6\text{Br}_{36}$ . The three different K positions (a), (b), (c) are considered for the  $\text{Cs}_{21}\text{K}_3\text{Pb}_6\text{Br}_{36}$ . It indicates that the K incorporation has little effect on the bandgap shift. The 0D  $\text{Cs}_4\text{K}_x\text{Pb}_6\text{Br}_6$  also has a large bandgap that can form the 0D/3D heterostructure for facilitating the radiative recombination.

The formation energies of K incorporated were calculated by the following formulas:

$$E_{\text{form}} = E(\text{incorporated}) - E(\text{pure}) - \mu(\text{K}) + \mu(\text{Cs})$$

where  $E(\text{incorporated})$  and  $E(\text{pure})$  are the total energies of K- incorporated and pure  $\text{Cs}_4\text{PbBr}_6$ , respectively.  $\mu(\text{K})$  and  $\mu(\text{Cs})$  are chemical potentials of K or Cs atom, respectively.

The chemical potentials of K or Cs atom

$$\text{K: } -2.0589750/2 = -1.0294875 \text{ eV}$$

$$\text{Cs: } -1.7039335/2 = -0.85196675 \text{ eV}$$

$$\text{Cs}_4\text{PbBr}_6: -207.47095 \text{ eV}$$

$$1\text{-K-Cs}_4\text{PbBr}_6: -207.32740 \text{ eV}$$

$$3\text{-K-Cs}_4\text{PbBr}_6 -207.06845 \text{ eV}$$

The Formation energies of K incorporated:

$$1\text{-K-Cs}_4\text{PbBr}_6:$$

$$-207.32740 + 207.47095 + 1.0294875 - 0.85196675 = 0.32107075 \text{ eV}$$

$$3\text{-K-Cs}_4\text{PbBr}_6$$

$$-207.06845 + 207.47095 + 3 \times 1.0294875 - 3 \times 0.85196675 = 0.93506225 \text{ eV}$$

The average formation energy of K: 0.312 eV, the average formation energy confirm the possibility for the formation of  $\text{Cs}_{4-x}\text{K}_x\text{PbBr}_6$ .

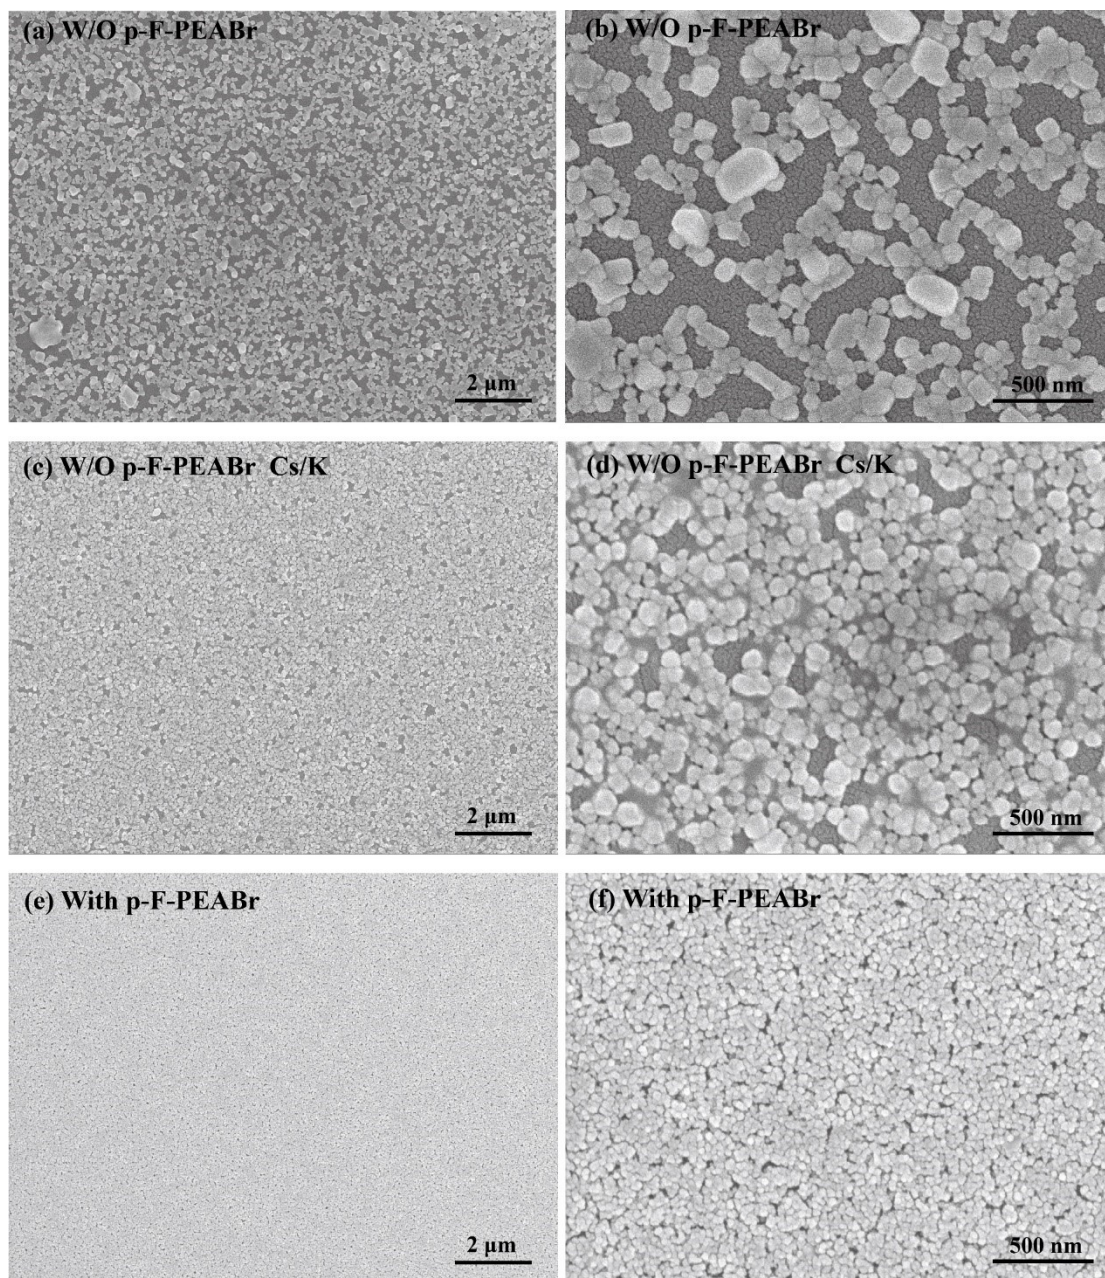

**Figure S2** FE-SEM of (a) low and (b) high magnification of the CsPbBr<sub>3</sub> films, (c) low (d) high magnification of the (Cs/K)PbBr<sub>3</sub> films, (e) low and (f) high magnification of the p-F-PEABr treatment CsPbBr<sub>3</sub> films.

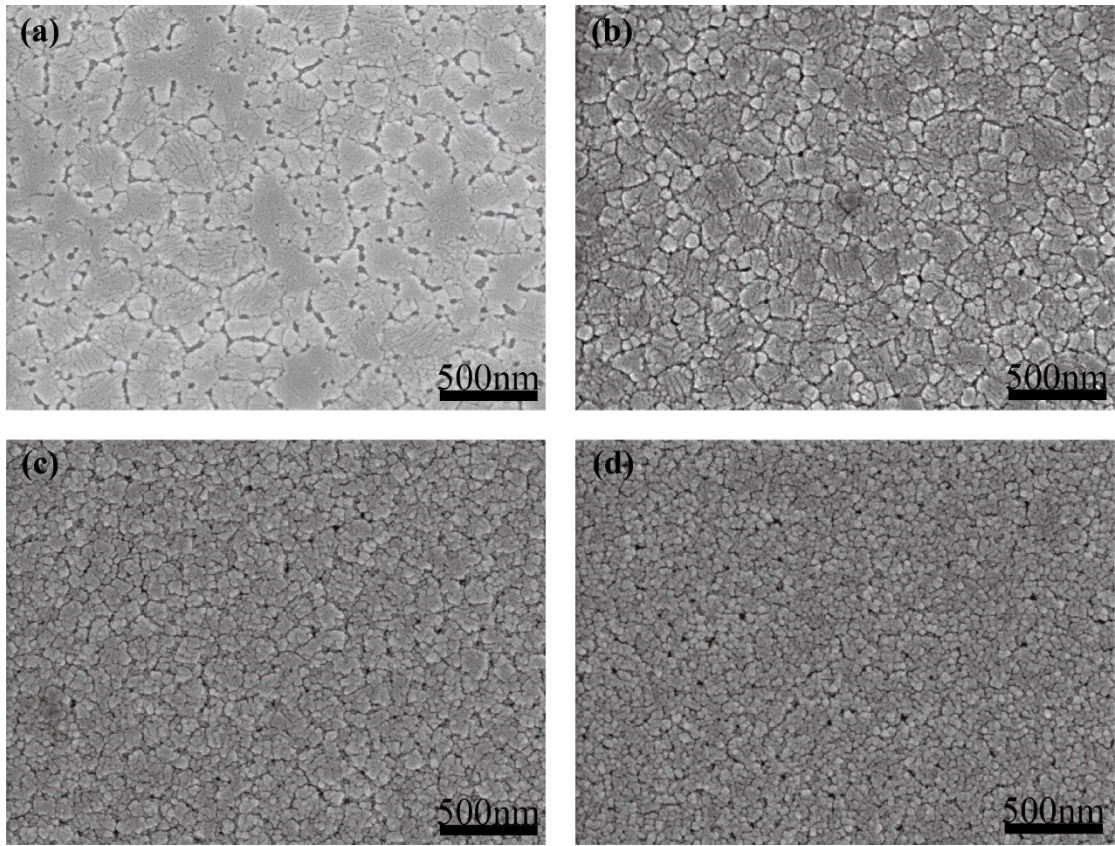

**Figure S3** FE-SEM of (a) p-F-PEABr, (b) p-F-PEABr DMSO:DMF=4:1, (c) p-F-PEABr DMSO:DMF=4:1 PEO, (d) p-F-PEABr DMSO:DMF=4:1 PEO 4 mg/ml CE 2 mg/ml, scale bar 500 nm. The samples were prepared with the molar ratios of 1.1:1:0.22, for CsBr:PbBr<sub>2</sub>:p-F-PEABr.

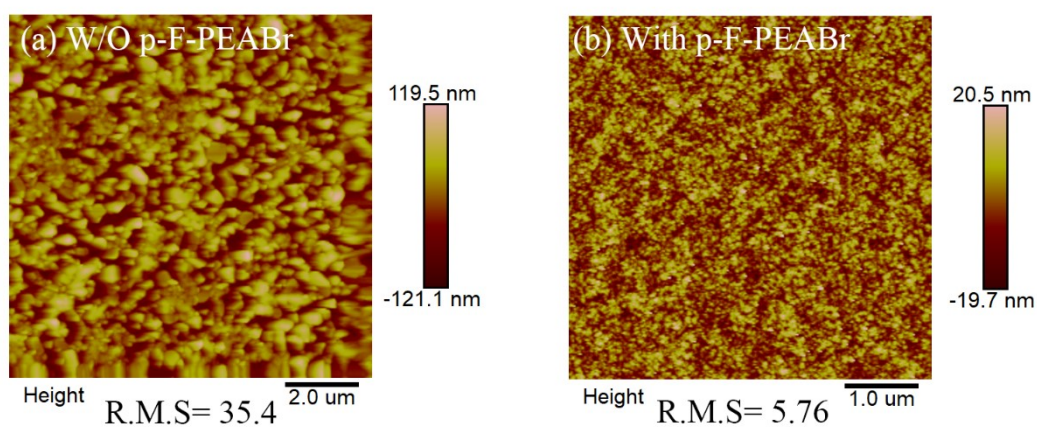

**Figure S4** The atomic force microscopy (AFM) images show that the morphology of the perovskite film (a) without p-F-PEABr treatment and (b) with p-F-PEABr treatment. The samples were prepared with the molar ratios of 1:1:0 and 1:1:0.2, respectively, for CsBr:PbBr<sub>2</sub>:p-F-PEABr.

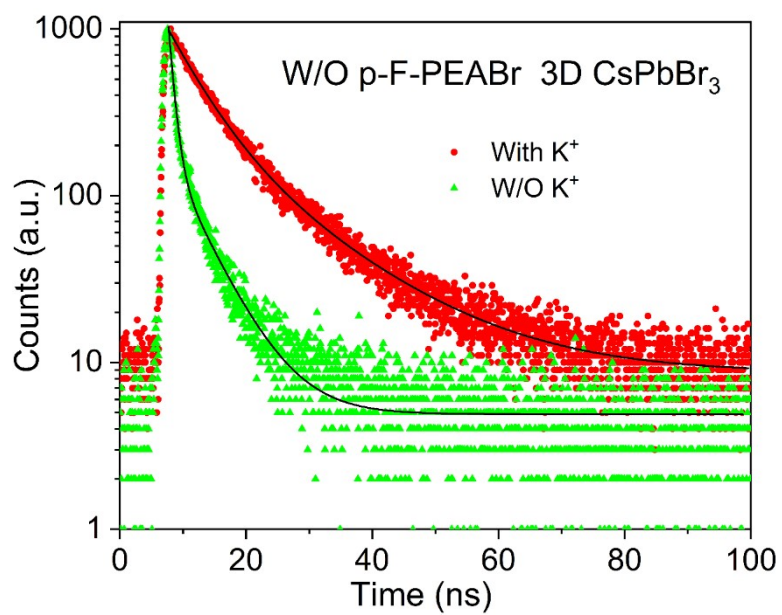

**Figure S5** TRPL of the 3D CsPbBr<sub>3</sub> with and without K<sup>+</sup> addition. The samples were prepared with the molar ratios of 1.1:1:0 and 1.1:1:0.05, for CsBr:PbBr<sub>2</sub>:KBr and dissolved in pure DMSO.

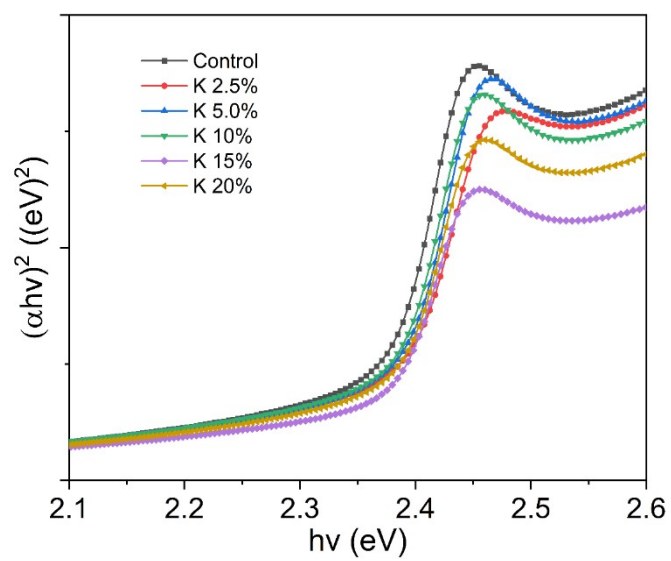

**Figure S6** Tauc plots showing the dependence of  $(\alpha hv)^2$  of 3D CsPbBr<sub>3</sub> and 0D/3D heterostructure perovskite films upon the incident photon energy ( $h\nu$ ) (assuming direct allowed transitions).



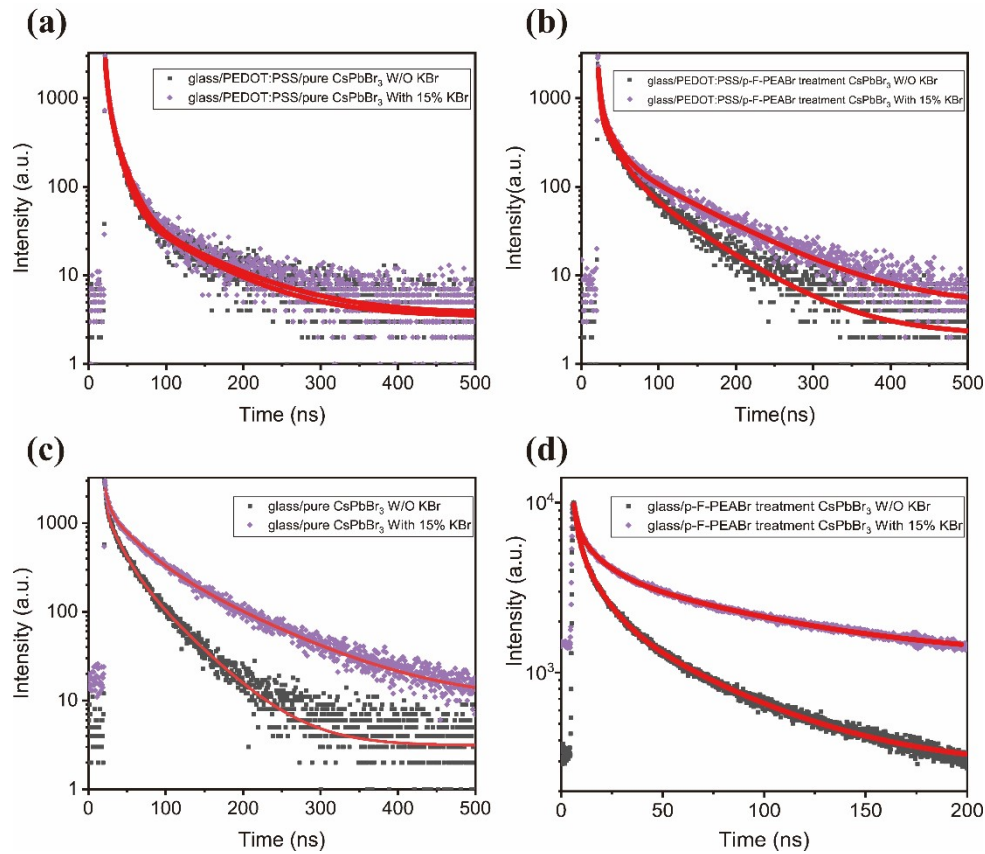

**Figure S7** TRPL decay curves of (a) 3D CsPbBr<sub>3</sub> and K15% 0D/3D heterostructure perovskite and (b) p-F-PEABr treatment 3D CsPbBr<sub>3</sub> and K15% 0D/3D heterostructure perovskite with the configuration of glass/PEDOT:PSS/perovskite films. (The perovskite were dissolved in DMSO/DMF mixture solvent (4:1, by volume) along with PEO 4mg/ml CE 2mg/ml) (c) 3D CsPbBr<sub>3</sub> and K15% 0D/3D heterostructure perovskite and (d) p-F-PEABr treatment 3D CsPbBr<sub>3</sub> and K15% 0D/3D heterostructure perovskite with the configuration of glass/perovskite films. The fitting results are listed in Tables S3 and S4.

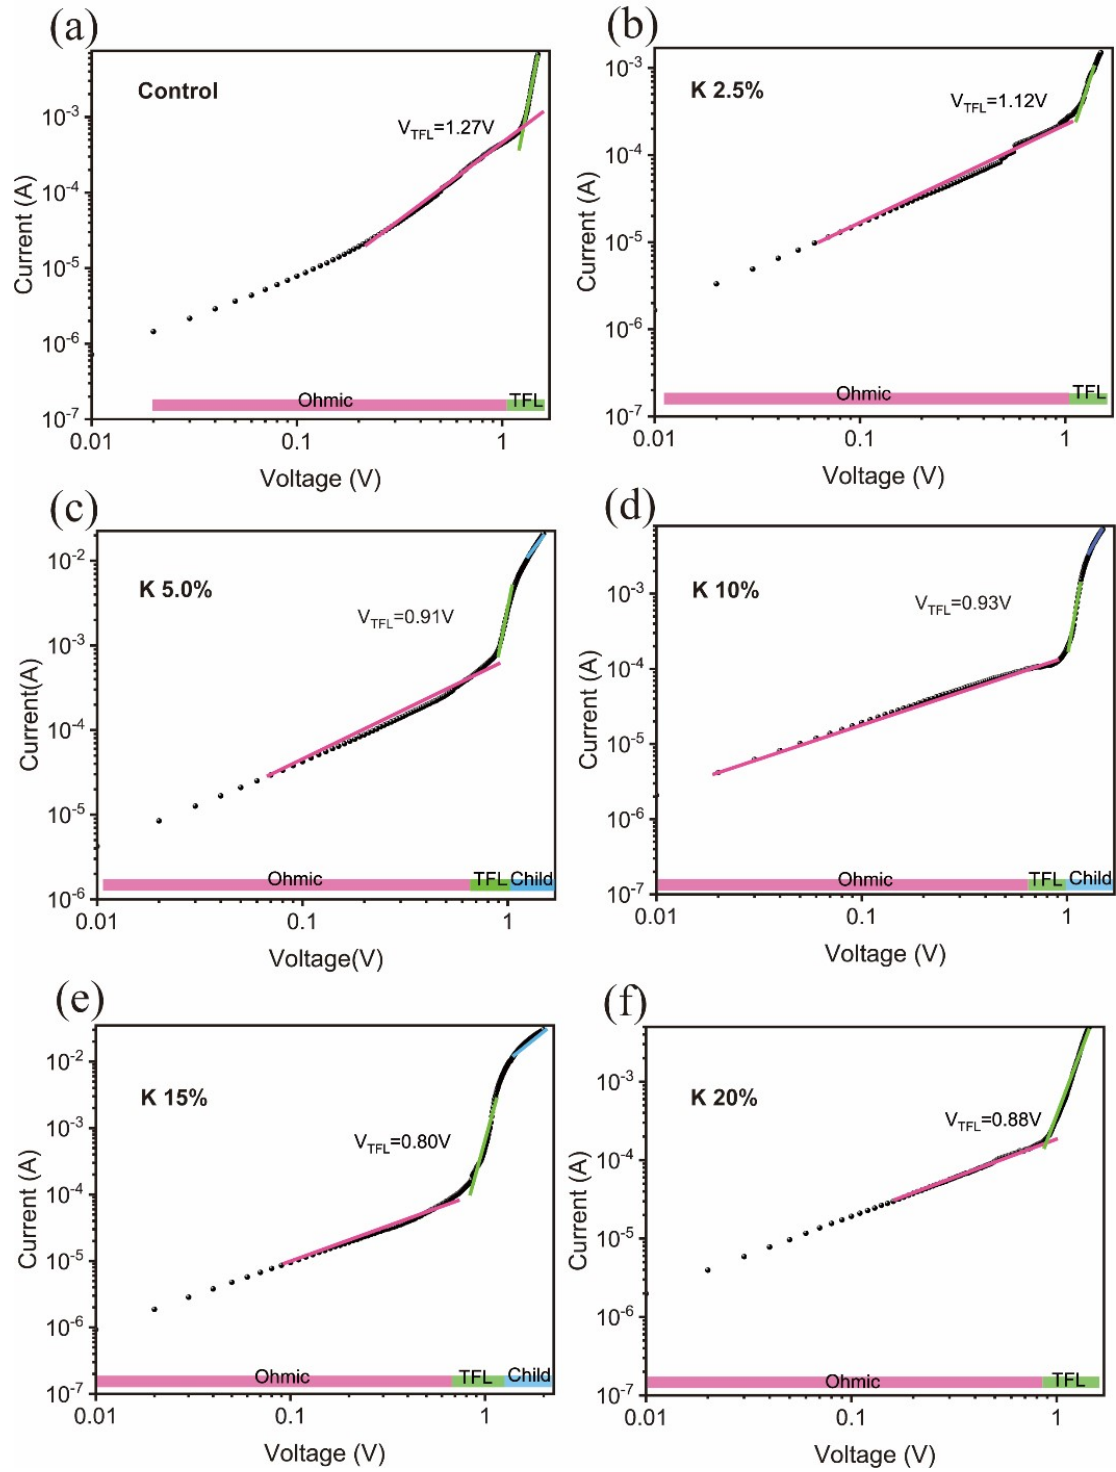

**Figure S8** Dark current-voltage measurements of the hole only device, with the structure of ITO/PEDOT:PSS/perovskite/MoO<sub>3</sub>/Ag with various  $K^+$  addition for 3D CsPbBr<sub>3</sub> and 0D/3D heterostructure perovskite.

The trap density ( $n_t$ ) of the perovskite thin films with different of K<sup>+</sup> addition can be

extracted by the equation 
$$n_t = \frac{2V_{TFL}\epsilon\epsilon_0}{eL^2}$$
, where  $\epsilon_0$ ,  $e$  and  $L$  represent vacuum permittivity, elementary charge and thickness of the perovskite film, respectively;  $\epsilon$  is the average relative dielectric constant of the perovskite thin films with different potassium ratios. The red line represents the ohmic regime of each case, and the green line indicates the trap-filled limit (TFL) regime with the onset voltage ( $V_{TFL}$ ).

Considering the different perovskite films were spin-coated with the same process, we assume the same film thickness. Generally, the lower value of  $V_{TEF}$  indicates the lower concentration of trap states in the film.

$\epsilon_0$  is the vacuum permittivity ( $8.854 \times 10^{-12}$  F m<sup>-1</sup>)

$\epsilon$  is the relative dielectric constant of the perovskite layer; we tend to take it as 19.2 from the previous report.<sup>1</sup>

$L$  is the thickness of the perovskite emitter layer (taken as 50 nm from the SEM result)

| Samples | $\eta_t/cm^{-3}$       |
|---------|------------------------|
| Control | $1.079 \times 10^{18}$ |
| K 2.5   | $9.520 \times 10^{17}$ |
| K 5.0   | $7.735 \times 10^{17}$ |
| K 10    | $7.905 \times 10^{17}$ |
| K 15    | $6.800 \times 10^{17}$ |
| K 20    | $7.480 \times 10^{17}$ |

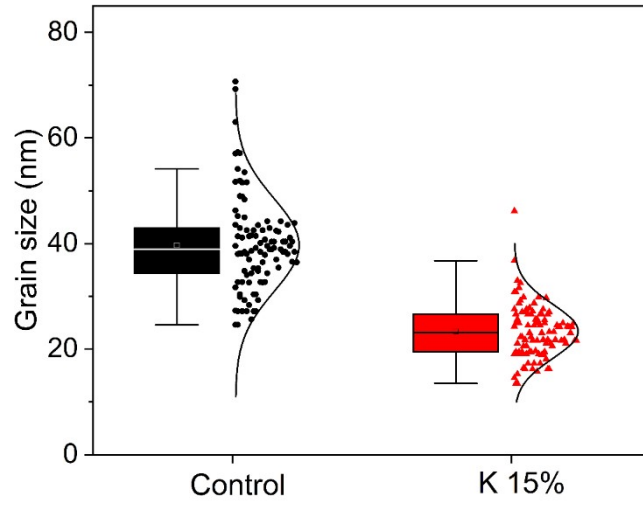

**Figure S9** Particle size distribution of the p-F-PEABr treatment 3D CsPbBr<sub>3</sub> for control and K15% 0D/3D heterostructure perovskite samples.

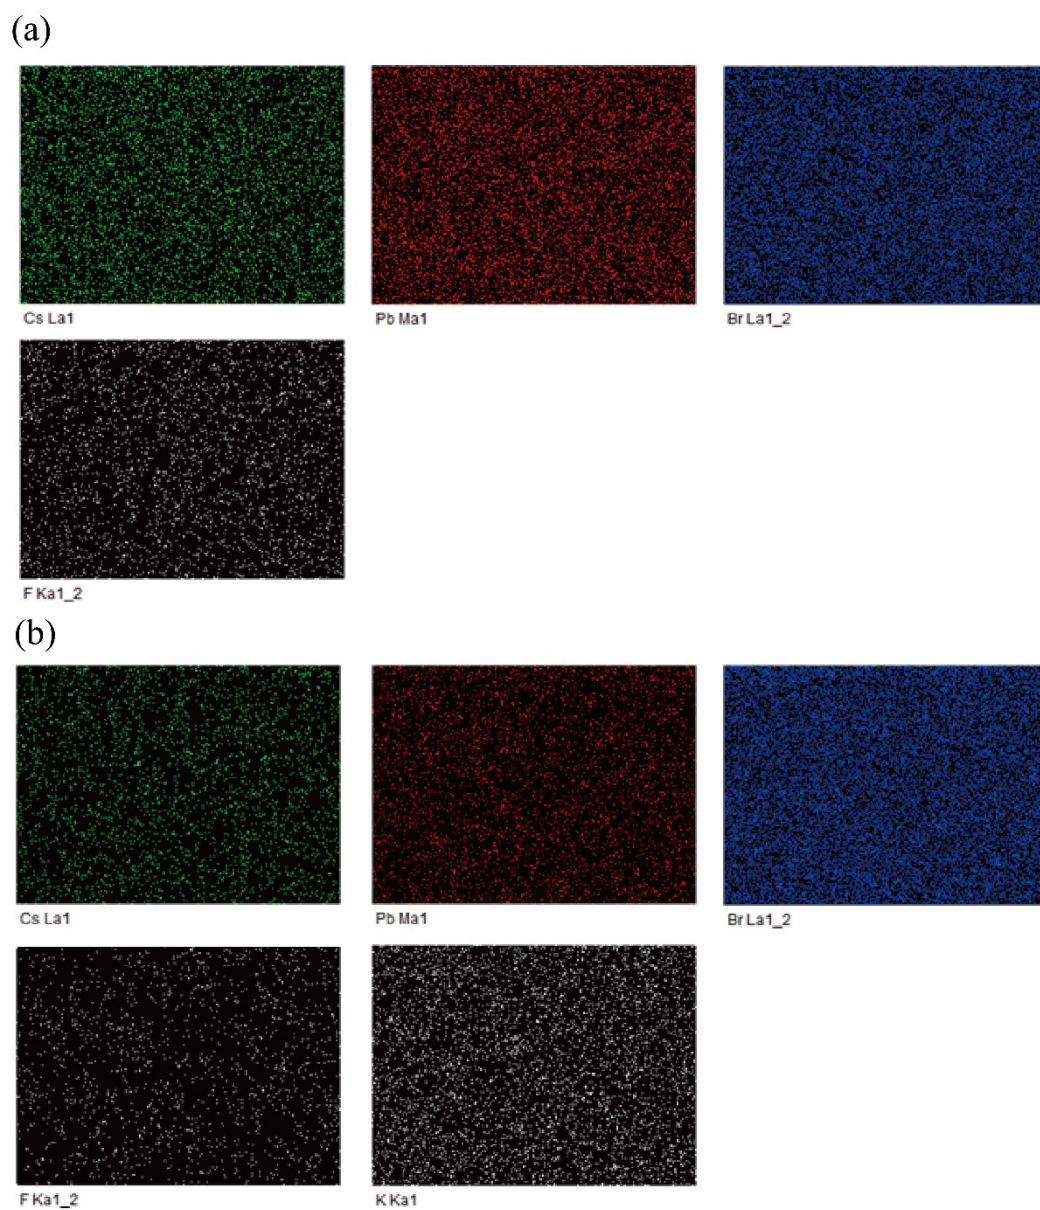

**Figure S10** Elemental mapping of the perovskite films showing the distribution of the homogeneous elements of (a) the p-F-PEABr treatment 3D CsPbBr<sub>3</sub> and (b) the p-F-PEABr treatment K15% 0D/3D heterostructure perovskite

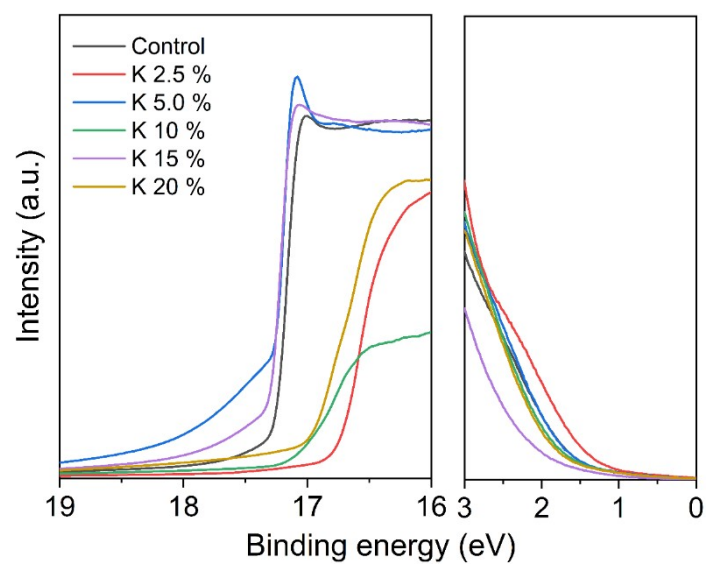

**Figure S11** UPS Spectra of the p-F-PEABr treatment 3D CsPbBr<sub>3</sub> and 0D/3D heterostructure perovskite showing the binding energy secondary-electron cutoffs (left) and HOMO regions (right).

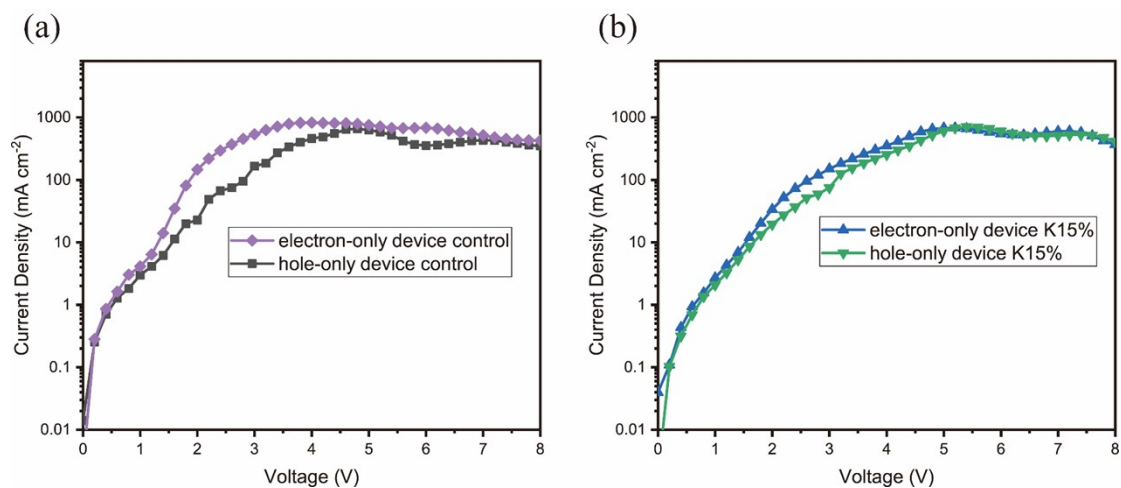

**Figure S12** Current density-voltage (J-V) curves of electron-only (ITO/ SnO<sub>2</sub>/ perovskite/ TPBi/ LiF/ Al) and hole-only (ITO/ PEDOT:PSS/ perovskite/ MoO<sub>3</sub>/ Ag) devices for (a) 3D CsPbBr<sub>3</sub> and (b) K15% 0D/3D heterostructure perovskite films.

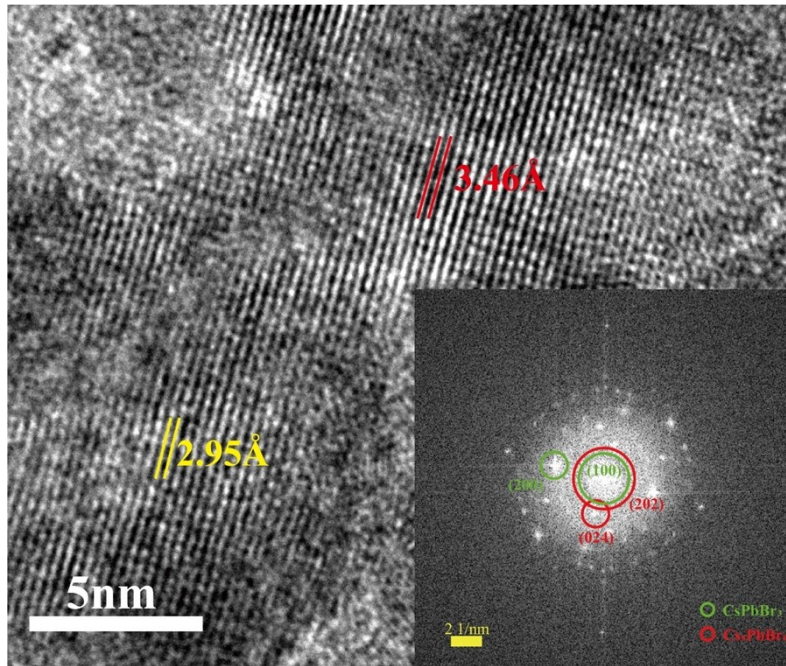

**Figure S13** HRTEM of the K20% 0D/3D heterostructure perovskite films with the corresponding FFT result.



**Table S1** Summary of the time-resolved photoluminescence lifetime fitting parameters of the 3D CsPbBr<sub>3</sub> and 0D/3D heterostructure perovskite films.

| Samples | $\tau_1/ns$ | $A_1$ | $\tau_2/ns$ | $A_2$ | $\tau_3/ns$ | $A_3$ | $\tau_{avg}/ns$ |
|---------|-------------|-------|-------------|-------|-------------|-------|-----------------|
| Control | 2.54        | 6.50  | 14.07       | 26.68 | 66.87       | 66.82 | 63.51           |
| K 2.5   | 2.37        | 6.41  | 13.00       | 24.62 | 71.50       | 68.98 | 66.10           |
| K 5.0   | 2.94        | 5.50  | 15.39       | 25.22 | 71.24       | 69.27 | 65.87           |
| K 10    | 2.37        | 6.63  | 12.73       | 22.54 | 75.00       | 70.83 | 68.18           |
| K 15    | 2.57        | 2.58  | 14.85       | 12.41 | 99.36       | 85.01 | 83.40           |
| K 20    | 3.42        | 3.40  | 17.80       | 16.55 | 88.12       | 80.05 | 77.39           |

**Table S2** Summary of the fitting results of the PL temperature dependence for the control and K15% 0D/3D heterostructure perovskite samples. (Based on the combined exciton-trap model)

| Sample                     | $D_1$ | $E_q/meV$ | $C_1$  | $E_j/meV$ | $I(0)$             |
|----------------------------|-------|-----------|--------|-----------|--------------------|
| Control                    | 47.22 | 38.33     | 117.41 | 56.36     | $2.94 \times 10^7$ |
| K15% 0D/3D heterostructure | 7.11  | 8.34      | 37.04  | 64.20     | $1.22 \times 10^7$ |

**Table S3** Summary of the time-resolved photoluminescence lifetime fitting parameters of the glass/PEDOT:PSS/ Pure CsPbBr<sub>3</sub> perovskite films with and without 15% KBr, glass/PEDOT:PSS/p-F-PEABr treatment 3D CsPbBr<sub>3</sub> and K15% 0D/3D heterostructure perovskite films.

| Samples                                              | $\tau_1/ns$ | $A_1$ | $\tau_2/ns$ | $A_2$ | $\tau_3/ns$ | $A_3$ | $\tau_{avg}/ns$ |
|------------------------------------------------------|-------------|-------|-------------|-------|-------------|-------|-----------------|
| Pure CsPbBr <sub>3</sub><br>W/O K <sup>+</sup>       | 2.58        | 24.17 | 11.23       | 52.86 | 75.56       | 22.97 | 23.92           |
| Pure CsPbBr <sub>3</sub><br>With 15% K               | 3.32        | 25.00 | 14.08       | 52.36 | 84.97       | 22.64 | 27.44           |
| p-F-PEABr treatment<br>3D CsPbBr <sub>3</sub>        | 1.91        | 8.47  | 16.81       | 37.91 | 50.26       | 53.62 | 33.48           |
| p-F-PEABr treatment<br>K15% 0D/3D<br>heterostructure | 4.81        | 6.23  | 32.42       | 32.92 | 99.21       | 60.85 | 71.34           |

**Table S4** Summary of the time-resolved photoluminescence lifetime fitting parameters of the glass/3D CsPbBr<sub>3</sub> perovskite films with and without 15% KBr, glass/p-F-PEABr treatment 3D CsPbBr<sub>3</sub> and K15% 0D/3D heterostructure perovskite films.

| Samples                                              | $\tau_1/ns$ | $A_1$ | $\tau_2/ns$ | $A_2$ | $\tau_3/ns$ | $A_3$ | $\tau_{avg}/ns$ |
|------------------------------------------------------|-------------|-------|-------------|-------|-------------|-------|-----------------|
| 3D CsPbBr <sub>3</sub><br>W/O K <sup>+</sup>         | 2.18        | 14.55 | 19.01       | 35.38 | 72.88       | 50.07 | 43.54           |
| 3D CsPbBr <sub>3</sub><br>With 15% K                 | 2.57        | 11.44 | 15.00       | 27.29 | 91.57       | 61.27 | 60.49           |
| p-F-PEABr treatment<br>3D CsPbBr <sub>3</sub>        | 2.54        | 6.50  | 14.07       | 26.68 | 66.87       | 66.82 | 63.51           |
| p-F-PEABr treatment<br>K15% 0D/3D<br>heterostructure | 2.57        | 2.58  | 14.85       | 12.41 | 99.36       | 85.01 | 83.40           |

(1) Schlaus, A. P.; Spencer, M. S.; Miyata, K.; Liu, F.; Wang, X.; Datta, I.; Lipson, M.; Pan, A.; Zhu, X. Y. How lasing happens in CsPbBr<sub>3</sub> perovskite nanowires. *Nature Commun.* **2019**, *10*, 265.
